# Supplementary material
Source: PubMed Central journal article supplement (PMC2268840)

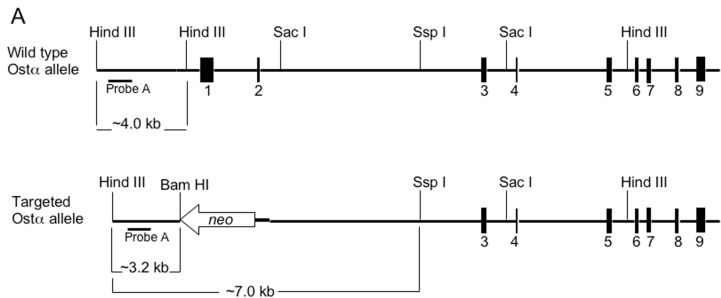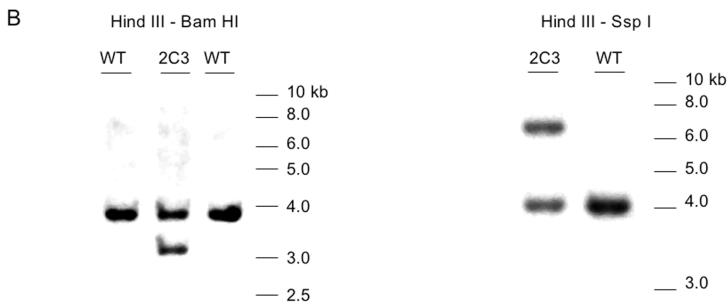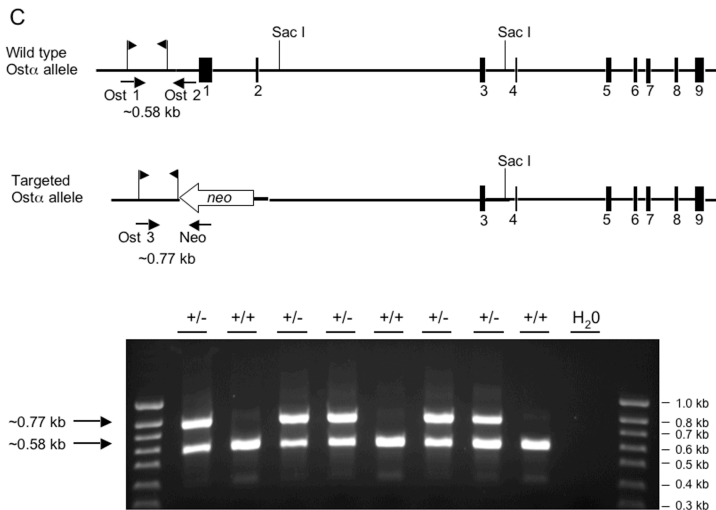

Supplement: pnas_0712328105_1.pdf [file pnas_0712328105_1.pdf]

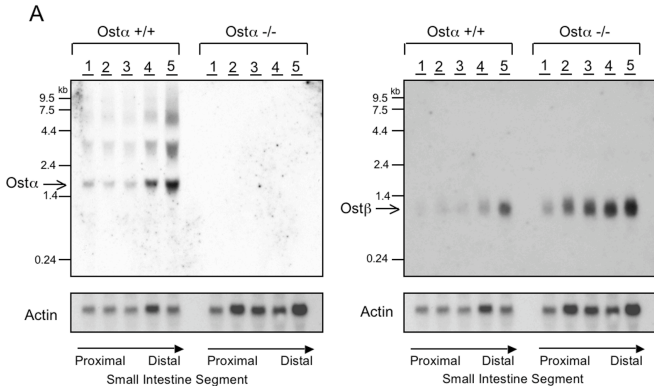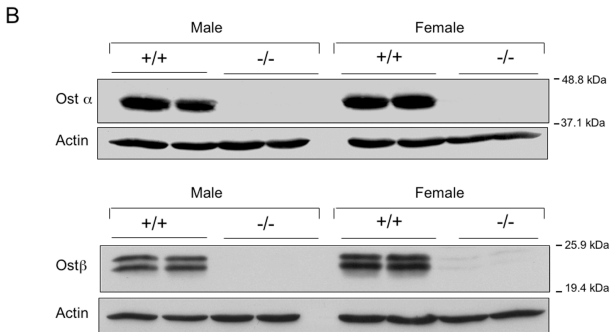

Supplement: pnas_0712328105_2.pdf [file pnas_0712328105_2.pdf]

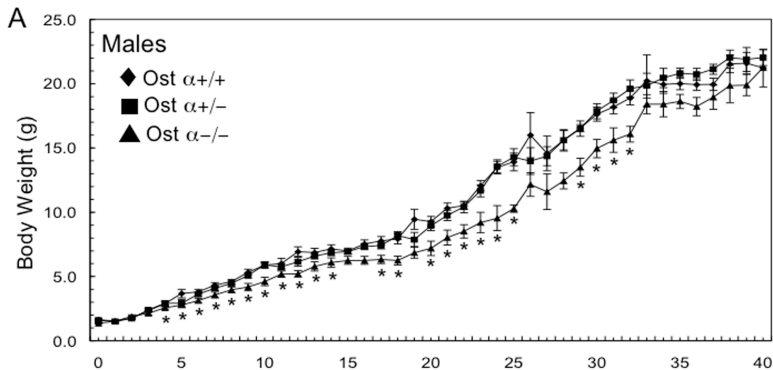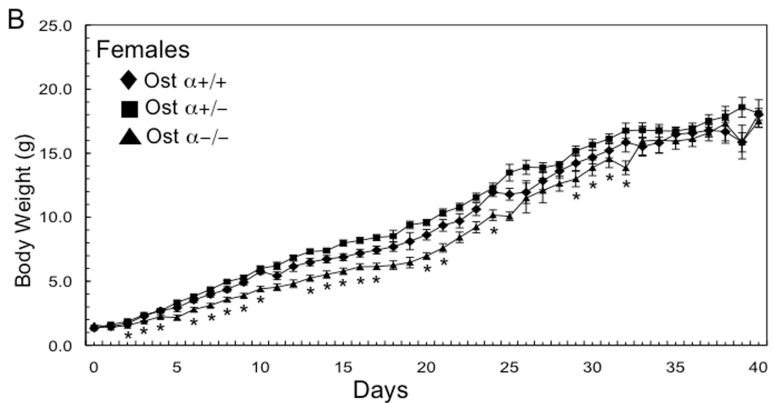

Supplement: pnas_0712328105_3.pdf [file pnas_0712328105_3.pdf]

**A**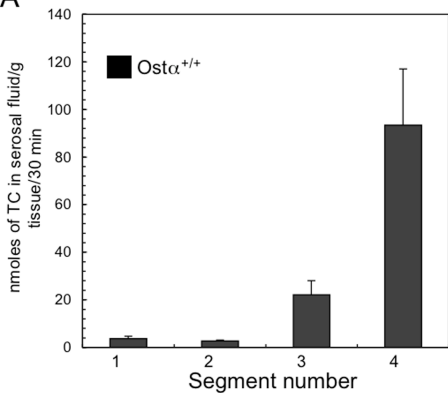**B**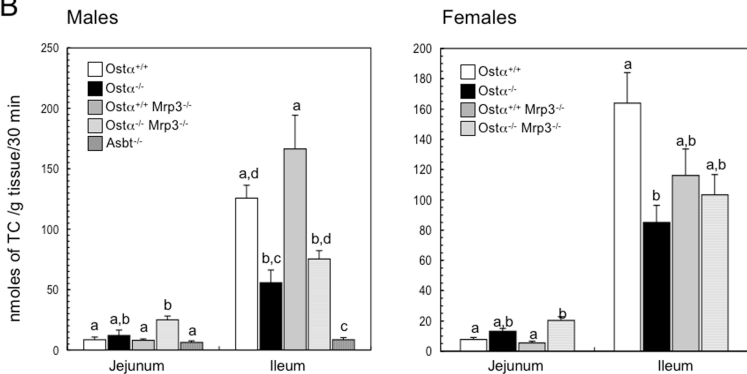**C**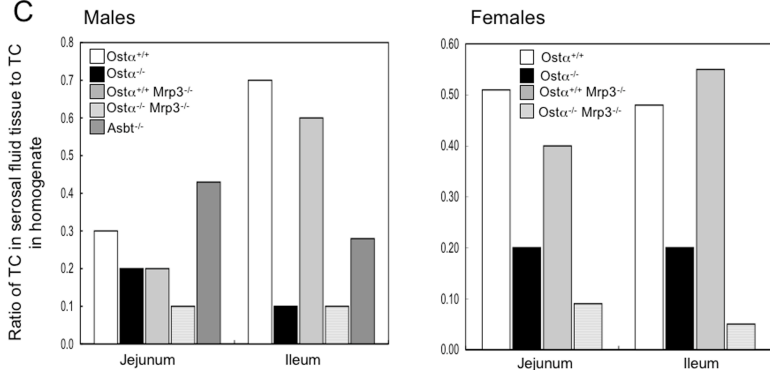

Supplement: pnas_0712328105_4.pdf [file pnas_0712328105_4.pdf]

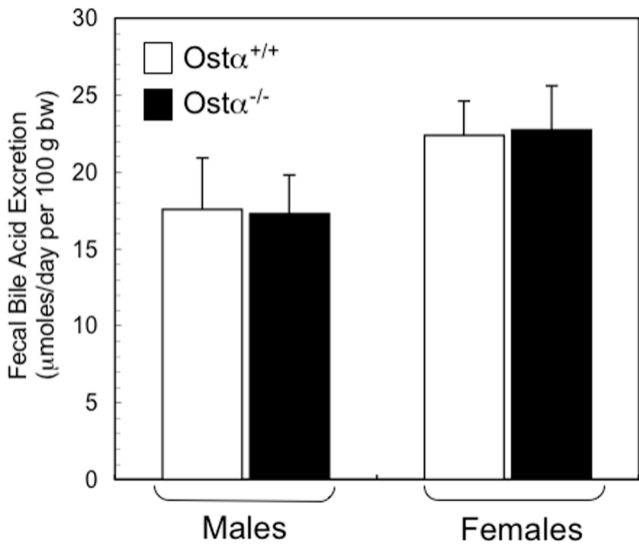

Supplement: pnas_0712328105_5.pdf [file pnas_0712328105_5.pdf]
